- thane, methoxyflurane, pentobarbital, and thiamylal. *J Appl Physiol* 30:36-43, 1971
16. Miller ED, Kistner JR, Epstein RM: Whole-body distribution of radioactively labelled microspheres in the rat during anesthesia with halothane, enflurane, or ketamine. *ANESTHESIOLOGY* 52:296-302, 1980
  17. Forsyth RP, Hoffbrand BI: Redistribution of cardiac output after sodium pentobarbital anesthesia in the monkey. *Am J Physiol* 218:214-217, 1970
  18. Amory DW, Steffonson JL, Forsyth RP: Systemic and regional blood flow changes during halothane anesthesia in the rhesus monkey. *ANESTHESIOLOGY* 35:81-89, 1971
  19. Fan FC, Schuessler GB, Chen RVZ, et al: Determination of blood flow and shunting of 9 and 15  $\mu$ m spheres in the regional beds. *Am J Physiol* 237:H25-H33, 1979
  20. Smith NT, Zwart A, Beneken JEW: Interaction between the circulatory effect and uptake and distribution of halothane. Use of a multiple model. *ANESTHESIOLOGY* 37:47-58, 1972
  21. Brower RW, Merin RG: Left ventricular function and compliance in swine during halothane anesthesia. *ANESTHESIOLOGY* 509:409-415, 1979
  22. Merin RG, Verdouw PD, Willem de Jong J: Dose dependent depression of cardiac function and metabolism by halothane in swine (*Sus scrofa*). *ANESTHESIOLOGY* 46:417-423, 1977
  23. Eger EI II, Smith NT, Stoelting RK, et al: Cardiovascular effects of halothane in man. *ANESTHESIOLOGY* 32:396-409, 1970
  24. Miletich DJ, Ivankovich AD, Albrecht RF, et al: Absence of autoregulation of cerebral blood flow during halothane and enflurane anesthesia. *Anesth Analg (Cleve)* 55:100-109, 1976
  25. Morita H, Nemoto EM, Bleyaert AL, et al: Brain blood flow autoregulation and metabolism during halothane anesthesia in monkeys. *Am J Physiol* 233:H670-H676, 1977
  26. Miletich MJ, Gil KS, Albrecht RF, et al: Intracerebral blood flow distribution during hypotensive anesthesia in the goat. *ANESTHESIOLOGY* 53:210-214, 1980
  27. Hughes RL, Campbell D, Fitch W: Effects of enflurane and halothane on liver blood flow and oxygen consumption in the greyhound. *Br J Anaesth* 52:1079-1086, 1980
  28. Epstein RM, Deutsch S, Cooperman LH, et al: Splanchnic circulation during halothane anesthesia and hypercapnia in normal man. *ANESTHESIOLOGY* 27:654-661, 1966
  29. Deutsch S, Goldberg M, Steve GW, et al: Effects of halothane anesthesia on renal function in normal man. *ANESTHESIOLOGY* 27:793-804, 1966
  30. Westermarck L, Wahlen A: Blood circulation in the kidney of the cat under halothane anesthesia. *Acta Anaesthesiol Scand* 13:185-208, 1969
  31. Vatner SF, Smith NT: Effects of halothane on left ventricular function and distribution of regional blood flow in dogs and primates. *Circ Res* 34:155-161, 1974
  32. Westermarck L: Blood circulation in the skeletal muscle and skin of the cat under halothane anesthesia. *Acta Anaesthesiol Scand* 13:209-227, 1969

## ERRATA

The article, "Myocardial Functional and Metabolic Responses to Ischemia in Swine during Halothane and Fentanyl Anesthesia," which appeared in the February 1982 issue of *ANESTHESIOLOGY* contained several errors.

In table 3 on page 88, the unit for inosine should be  $\mu\text{mol} \cdot \text{l}^{-1}$ , not  $\text{mmol} \cdot \text{l}^{-1}$ . In table 4 on page 89, the unit for glucose uptake should be  $\mu\text{mol} \cdot \text{min}^{-1}$ , not  $\text{mmol} \cdot \text{min}^{-1}$ ; the unit for free fatty acids is  $\text{mmol} \cdot \text{min}^{-1}$ , not  $\text{mmol}$ ; and the unit for free fatty acid uptake is  $\mu\text{mol} \cdot \text{min}^{-1}$ , not  $\text{mmol} \cdot \text{min}^{-1}$ .
